# Supplementary material for: Single crystal growth of the novel Mn2(OH)2SO3, Mn2F(OH)SO3, and Mn5(OH)4(H2O)2[SO3]2[SO4] compounds using a hydrothermal method
Source: Royal Society of Chemistry journal article supplement (doi:10.1039/c3dt50415h), 2013-01-01
Supplement: c3dt50415h.pdf [file c3dt50415h.pdf]

Cite this: DOI: 10.1039/c0xx00000x

www.rsc.org/materials

## Supporting Information

### Single Crystal Growth of the Novel $\text{Mn}_2(\text{OH})_2\text{SO}_3$ , $\text{Mn}_2\text{F}(\text{OH})\text{SO}_3$ , and $\text{Mn}_5(\text{OH})_4(\text{H}_2\text{O})_2[\text{SO}_3]_2[\text{SO}_4]$ Compounds through the Hydrothermal Method

Hamdi Ben Yahia,\* Masahiro Shikano,\* and Hironori Kobayashi

<sup>5</sup> Received (in XXX, XXX) Xth XXXXXXXXXX 2012, Accepted Xth XXXXXXXXXX 20XX

DOI: 10.1039/b000000x

### Electronic Supplementary Information (ESI)

<sup>10</sup> Table S1

| B.V.S. before introducing the H atoms |                 | B.V.S. after introducing the H atoms |                |           |
|---------------------------------------|-----------------|--------------------------------------|----------------|-----------|
| Atom                                  | B.V.S.          | Atom                                 | B.V.S.         | Charge    |
| Mn1                                   | 1.920(5)        | Mn1                                  | 1.911(5)       | +2        |
| Mn2                                   | 1.983(4)        | Mn2                                  | 1.985(4)       | +2        |
| Mn3                                   | 2.042(4)        | Mn3                                  | 2.044(4)       | +2        |
| S1                                    | 4.126(12)       | S1                                   | 4.128(12)      | +4        |
| S2                                    | 4.090(12)       | S2                                   | 4.086(12)      | +4        |
| S3                                    | 6.36(2)         | S3                                   | 6.38(2)        | +6        |
| O1                                    | 1.763(8)        | O1                                   | 2.178(16)      | -2        |
| O2                                    | 2.005(7)        | O2                                   | 2.004(6)       | -2        |
| O3                                    | 2.017(6)        | O3                                   | 2.015(6)       | -2        |
| O4                                    | 1.929(9)        | O4                                   | 1.931(9)       | -2        |
| O5                                    | 1.682(16)       | O5                                   | 2.35(2)        | -2        |
| O6                                    | 2.029(10)       | O6                                   | 2.029(10)      | -2        |
| O7                                    | 1.938(10)       | O7                                   | 1.939(10)      | -2        |
| <b>O8</b>                             | <b>0.344(2)</b> | <b>O8</b>                            | <b>1.91(5)</b> | <b>-2</b> |
|                                       |                 | H8a                                  | 0.77(4)        | +1        |
|                                       |                 | H8b                                  | 1.02(3)        | +1        |
| <b>O9</b>                             | <b>1.127(3)</b> | <b>O9</b>                            | <b>1.83(3)</b> | <b>-2</b> |
|                                       |                 | H9                                   | 0.91(3)        | +1        |
| <b>O10</b>                            | <b>1.184(3)</b> | <b>O10</b>                           | <b>1.93(2)</b> | <b>-2</b> |
|                                       |                 | H10                                  | 0.95(2)        | +1        |
| <b>O11</b>                            | <b>1.099(4)</b> | <b>O11</b>                           | <b>1.85(3)</b> | <b>-2</b> |
|                                       |                 | H11                                  | 0.75(3)        | +1        |

B.V. =  $e^{(r_0-r)^b}$  with the following parameters:  $b = 0.37$ ,  $r_0(\text{S}^{\text{IV}}-\text{O}) = 1.644$ , and  $r_0(\text{Mn}^{\text{II}}-\text{O}) = 1.790 \text{ \AA}$ .<sup>15, 16</sup>

Table S2. Anisotropic displacement parameters ( $\text{\AA}^2$ ) for for  $\text{Mn}_2(\text{OH})_2\text{SO}_3$ ,  $\text{Mn}_2\text{F}(\text{OH})\text{SO}_3$ , and  $\text{Mn}_5(\text{OH})_4(\text{H}_2\text{O})_2[\text{SO}_3]_2[\text{SO}_4]$ . The anisotropic displacement factor exponent takes the form:  $-2\pi^2[(ha^*)^2U_{11}+\dots+2hka^*b^*U_{12}]$ .

| Atom                                                                                           | $U_{11}$    | $U_{22}$   | $U_{33}$   | $U_{12}$     | $U_{13}$     | $U_{23}$     |
|------------------------------------------------------------------------------------------------|-------------|------------|------------|--------------|--------------|--------------|
| <b><math>\text{Mn}_2(\text{OH})_2\text{SO}_3</math></b>                                        |             |            |            |              |              |              |
| Mn                                                                                             | 0.0110(4)   | 0.0201(4)  | 0.0121(4)  | -0.0002(3)   | 0.0007(3)    | -0.0015(3)   |
| S                                                                                              | 0.0119(8)   | 0.0135(8)  | 0.0120(7)  | 0            | -0.0008(6)   | 0            |
| O1                                                                                             | 0.015(3)    | 0.021(2)   | 0.017(2)   | 0            | 0.0063(18)   | 0            |
| O2                                                                                             | 0.0125(17)  | 0.0191(17) | 0.0134(14) | -0.0033(15)  | -0.0008(12)  | -0.0022(12)  |
| O3h                                                                                            | 0.0118(17)  | 0.0167(19) | 0.0162(15) | 0.0014(16)   | -0.0012(12)  | -0.0006(14)  |
| <b><math>\text{Mn}_2\text{F}(\text{OH})\text{SO}_3</math></b>                                  |             |            |            |              |              |              |
| Mn                                                                                             | 0.0093(7)   | 0.0158(7)  | 0.0094(8)  | -0.0005(6)   | 0.0018(6)    | -0.0006(7)   |
| S                                                                                              | 0.0081(14)  | 0.0066(14) | 0.0117(19) | 0            | -0.0015(14)  | 0            |
| O1                                                                                             | 0.013(5)    | 0.011(4)   | 0.016(5)   | 0            | 0.014(4)     | 0            |
| O2                                                                                             | 0.009(3)    | 0.014(3)   | 0.007(4)   | -0.004(2)    | -0.001(3)    | 0.002(3)     |
| O3h/F                                                                                          | 0.009(3)    | 0.028(3)   | 0.012(3)   | 0.001(3)     | -0.001(2)    | -0.002(3)    |
| <b><math>\text{Mn}_5(\text{OH})_4(\text{H}_2\text{O})_2[\text{SO}_3]_2[\text{SO}_4]</math></b> |             |            |            |              |              |              |
| Mn1                                                                                            | 0.0148(2)   | 0.0195(2)  | 0.0115(3)  | 0            | -0.00018(19) | 0            |
| Mn2                                                                                            | 0.01267(19) | 0.0177(2)  | 0.0170(2)  | -0.00077(10) | -0.00246(16) | -0.00040(11) |
| Mn3                                                                                            | 0.0194(2)   | 0.0186(2)  | 0.0125(2)  | -0.00111(11) | -0.00063(17) | 0.00100(11)  |
| S1                                                                                             | 0.0109(3)   | 0.0185(3)  | 0.0116(3)  | 0            | -0.0015(3)   | 0            |
| S2                                                                                             | 0.0157(3)   | 0.0168(3)  | 0.0098(3)  | 0            | -0.0026(3)   | 0            |
| S3                                                                                             | 0.0117(3)   | 0.0196(3)  | 0.0162(4)  | 0            | -0.0020(3)   | 0            |
| O1                                                                                             | 0.0100(8)   | 0.0270(10) | 0.0161(11) | 0            | -0.0010(8)   | 0            |
| O2                                                                                             | 0.0136(6)   | 0.0203(7)  | 0.0283(9)  | -0.0020(5)   | -0.0011(6)   | 0.0057(6)    |
| O3                                                                                             | 0.0314(8)   | 0.0202(7)  | 0.0140(8)  | -0.0054(6)   | -0.0015(7)   | 0.0002(6)    |
| O4                                                                                             | 0.0286(10)  | 0.0181(8)  | 0.0105(11) | 0            | -0.0027(9)   | 0            |
| O5                                                                                             | 0.0236(11)  | 0.0444(13) | 0.0329(15) | 0            | 0.0058(11)   | 0            |
| O6                                                                                             | 0.0139(9)   | 0.0200(9)  | 0.0319(14) | 0            | -0.0012(10)  | 0            |
| O7                                                                                             | 0.0222(7)   | 0.0511(11) | 0.0478(13) | 0.0071(8)    | 0.0021(9)    | 0.0320(11)   |
| O8                                                                                             | 0.0402(13)  | 0.0465(12) | 0.0388(14) | 0.0199(9)    | 0.0020(11)   | 0.0078(9)    |
| O9                                                                                             | 0.0137(6)   | 0.0185(6)  | 0.0162(8)  | -0.0004(6)   | -0.0016(6)   | -0.0013(6)   |
| O10                                                                                            | 0.0108(8)   | 0.0222(9)  | 0.0132(10) | 0            | 0.0001(8)    | 0            |
| O11                                                                                            | 0.0118(8)   | 0.0214(9)  | 0.0155(10) | 0            | 0.0009(8)    | 0            |

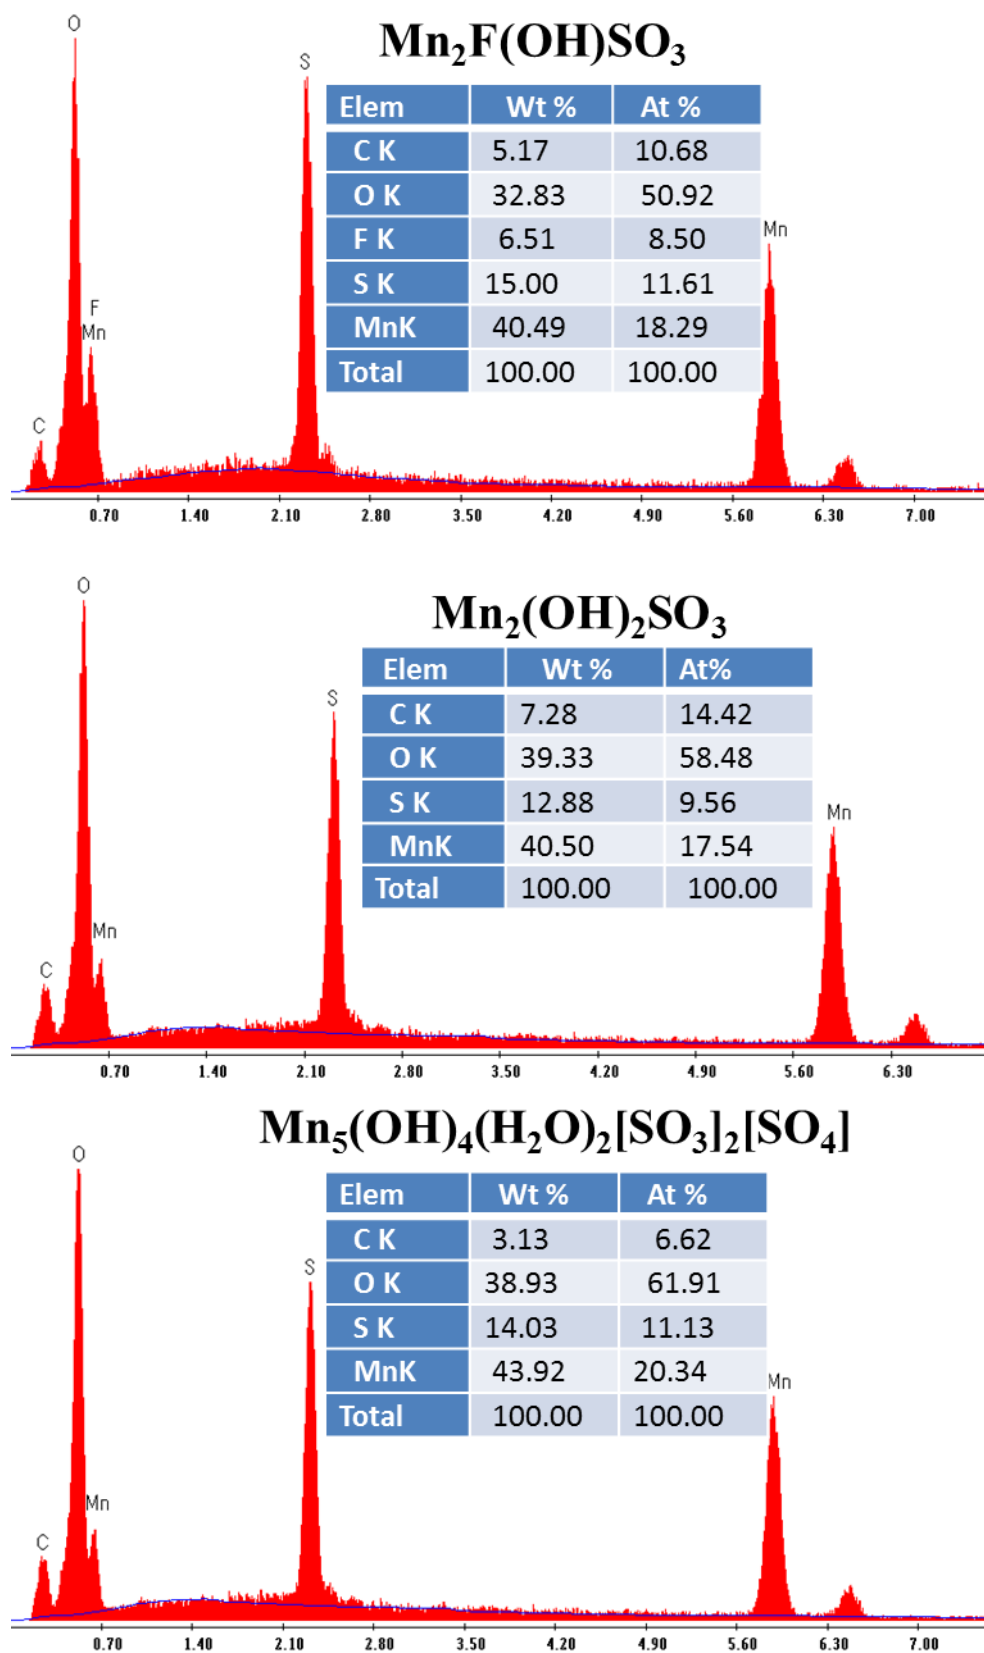

Fig. S1. EDX analysis of the single crystals investigated on the diffractometer.

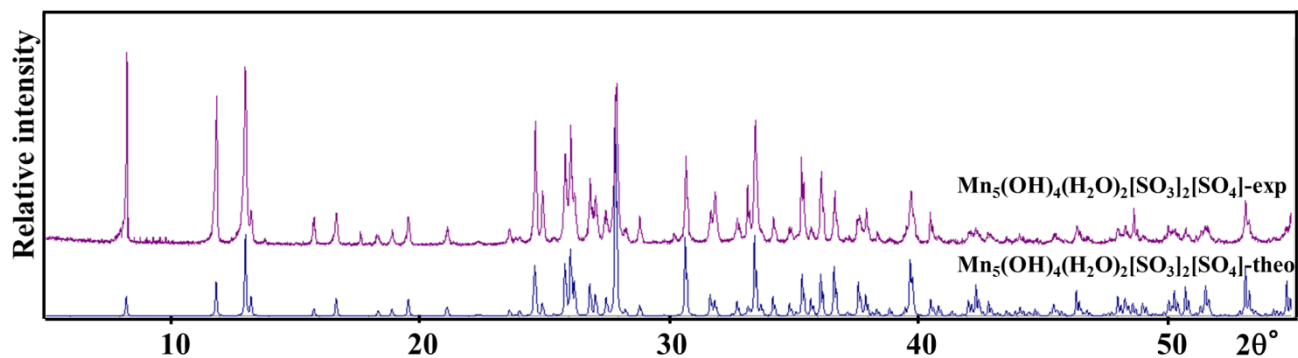

Fig. S2. The XRPD pattern of Mn<sub>5</sub>(OH)<sub>4</sub>(H<sub>2</sub>O)<sub>2</sub>[SO<sub>3</sub>]<sub>2</sub>[SO<sub>4</sub>] sample obtained from hydrothermal synthesis.

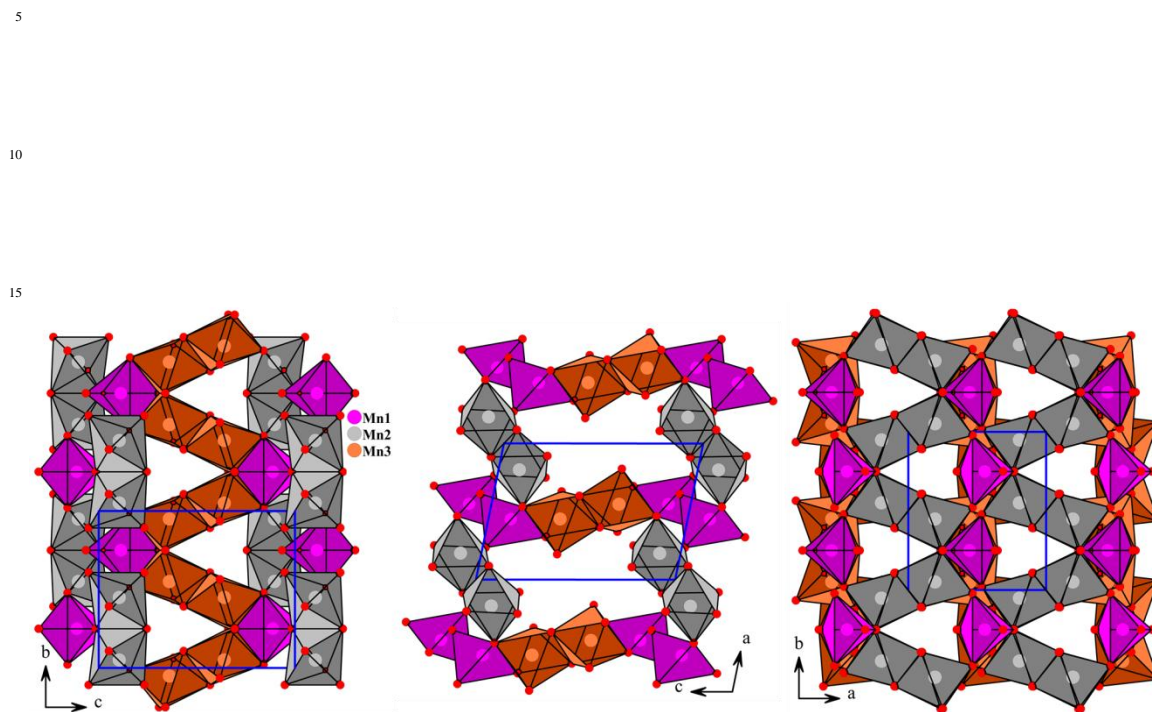

Fig. S3. Details of the connectivity between Mn1O<sub>5</sub>, Mn2O<sub>6</sub>, and Mn3O<sub>6</sub> polyhedra.

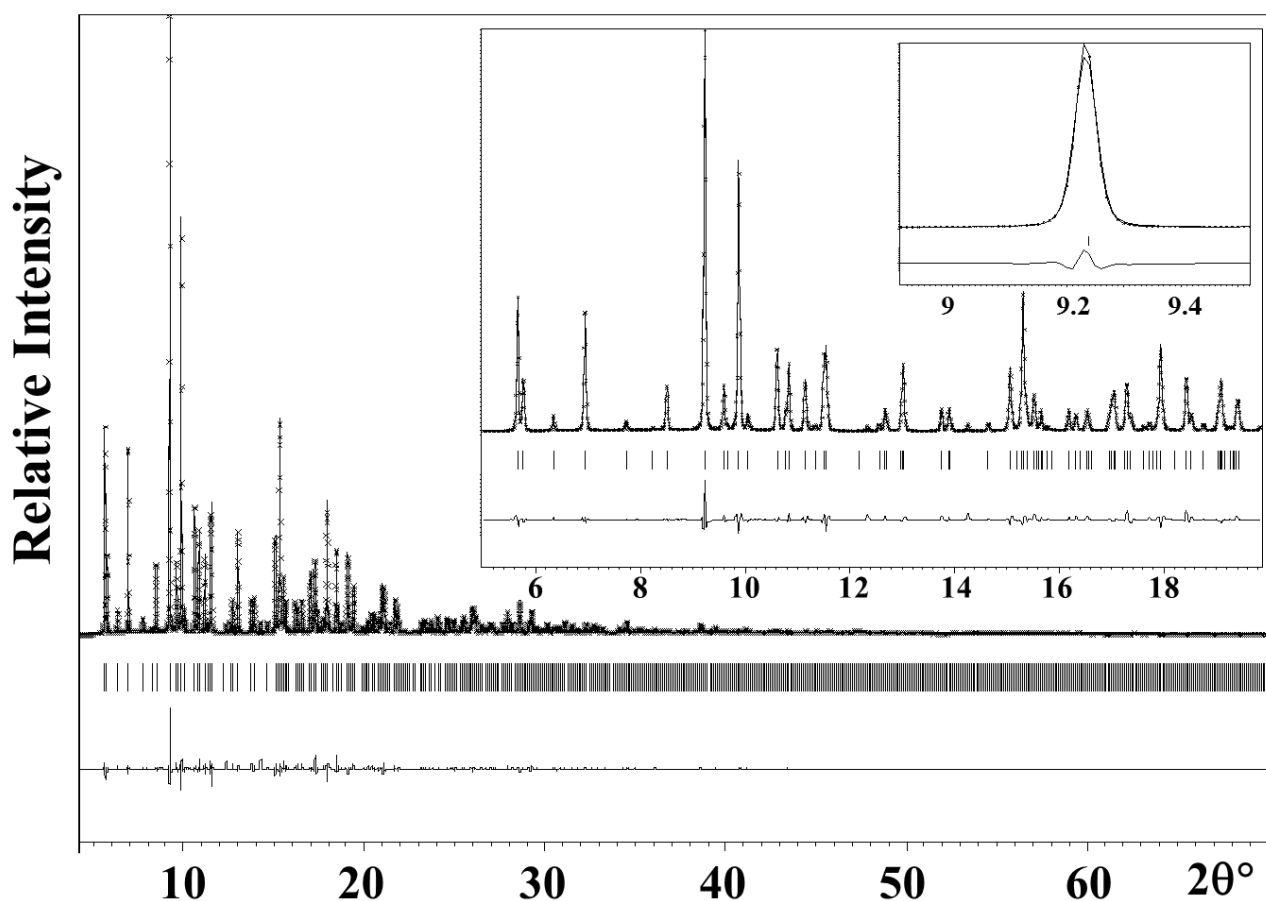

**Fig. S4.** Final observed, calculated and difference plots for synchrotron X-ray powder diffraction refinement ( $\lambda = 0.5001 \text{ \AA}$ ) of  $\text{Mn}_2(\text{OH})\text{FSO}_3$ .

5 “High resolution X-ray powder diffraction measurements were performed for  $\text{Mn}_2(\text{OH})\text{FSO}_3$ . The data were collected on BL19B2 at SPring-8 (with the approval of the Japan Synchrotron Radiation Research Institute (Proposal No. 2011A1795)) at room temperature over the  $2\theta$  angle range  $0^\circ \leq 2\theta \leq 78^\circ$  with a step size of  $0.01^\circ$  ( $\lambda = 0.5001 \text{ \AA}$ ). Full pattern matching refinements were performed with the Jana2006 program package. The backgrounds were estimated by a Legendre function, and the peak  
10 shapes were described by a pseudo-Voigt function. Asymmetry and preferential orientation parameters have been also refined using Simpson and March-Dallase functions, respectively. Then the single crystal structure of  $\text{Mn}_2(\text{OH})_2\text{SO}_3$  was used as starting model for the Rietveld refinement (Figure S4). After introducing OH/F statistical disorder, the reliability factors dropped to  $R_p = 0.0401$ ,  $R_{wp} = 0.0595$ , and  $R_B = 0.0459$ , confirming the accuracy of the model. Furthermore, the careful comparison  
15 of the obtained atomic positions to those from  $\text{Mn}_2(\text{OH})\text{FSO}_3$  single crystal refinement did not show any significant difference except for the proton atom which showed a slight shift of the  $x$  coordinate (Table 2).”
